# Supplementary material
Source: HighWire-hosted journal article supplement (https://qdcxjkg.com/highwire/filestream/112858/field_highwire_adjunct_files/0/Figure_1.pdf)

Fig. 1

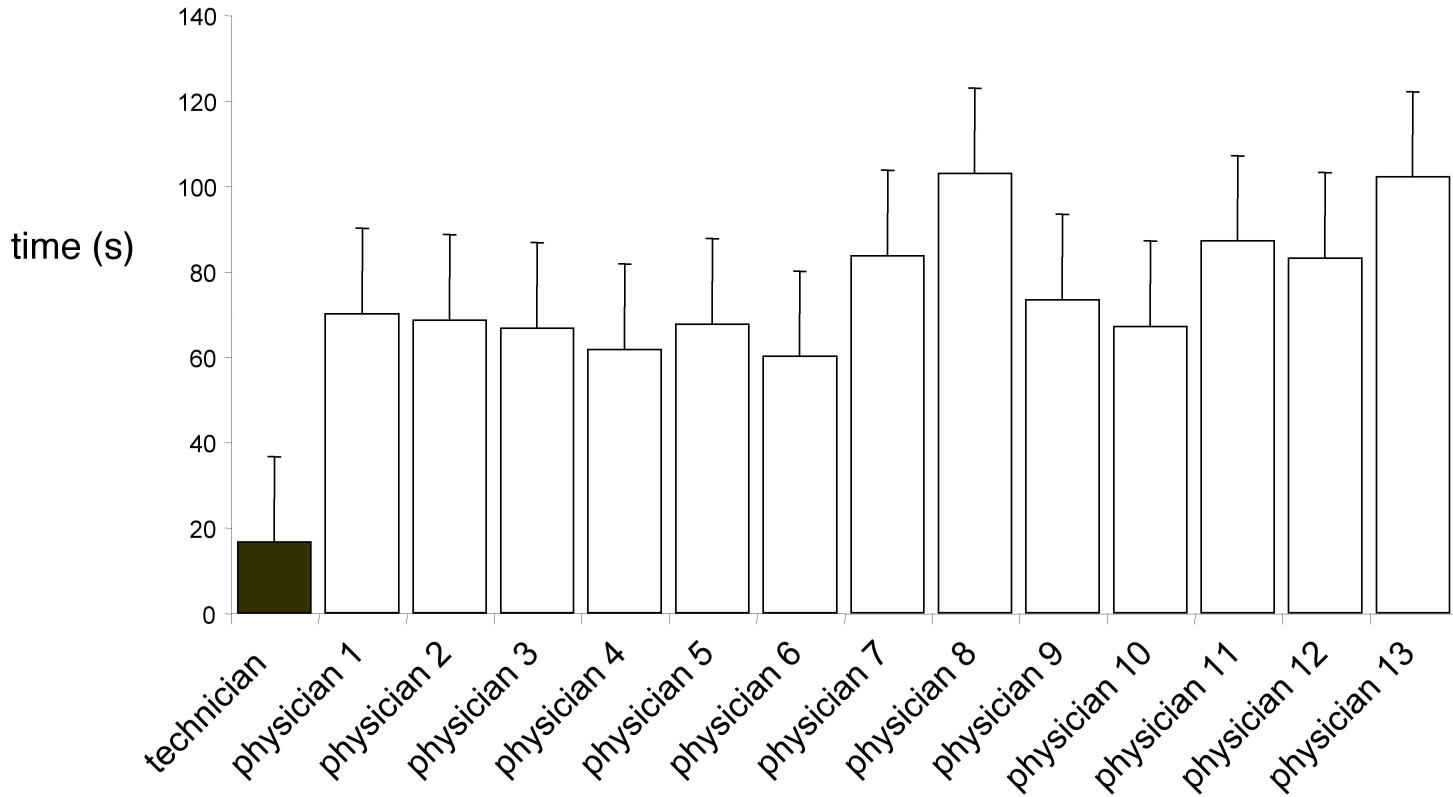

Supplement: Figure_1.pdf [file Figure_1.pdf]
